# Supplementary material for: HIF-1α and Pro-Inflammatory Signaling Improves the Immunomodulatory Activity of MSC-Derived Extracellular Vesicles
Source: PubMed Central journal article supplement (PMC8036951; doi:10.3390/ijms22073416), 2021-03-26
Supplement: ijms-22-03416-s001.pdf [file ijms-22-03416-s001.pdf]

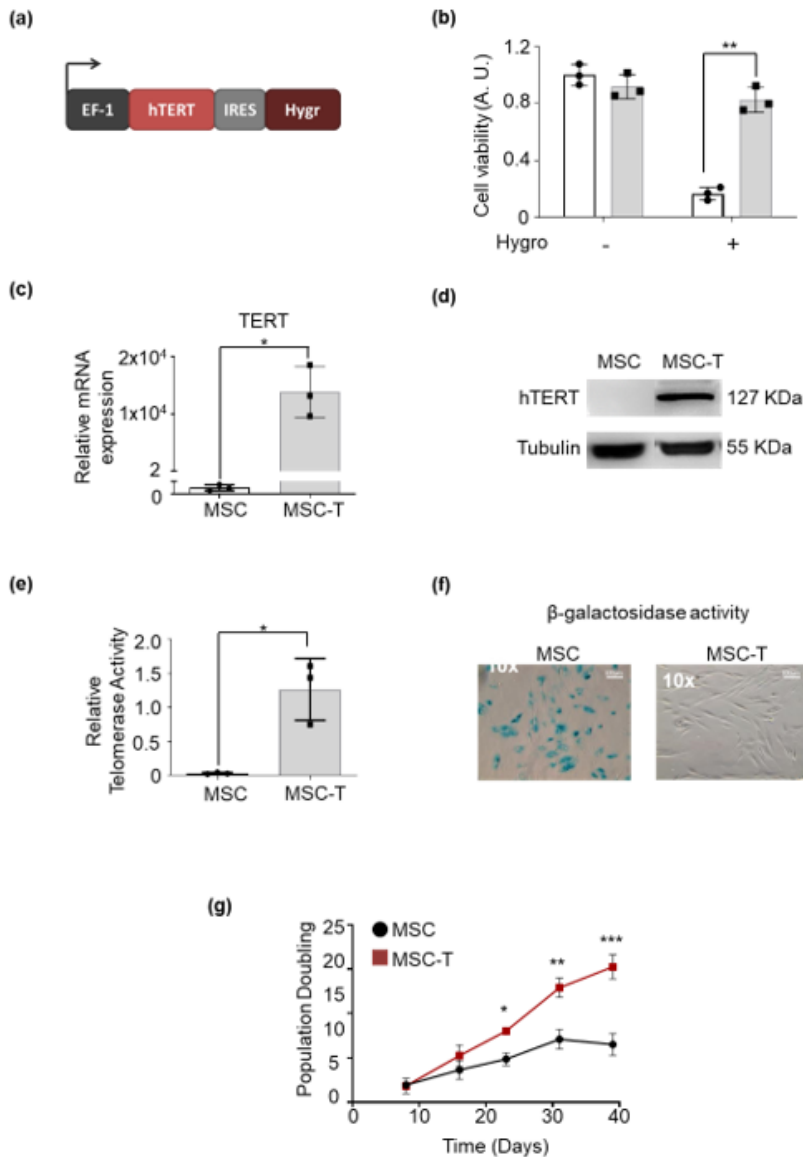

**Scheme 1. Generation and validation of a stable and non-senescent cell line.** a) Schematic representation of pLV-hTERT-Hygromycin lentiviral vector. b) Quantification of viable MSC (black) and MSC-T (grey) detected by MTT assay treated or not with hygromycin for 48 h. Values are represented as relative to MSC not treated condition and graphs represent the mean ± SD of 3 independent experiments. Paired t-test was used for statistics. c) hTERT gene expression levels quantified by RT-qPCR in MSC (black) and MSC-T (grey). The expression levels of the target gene in each sample were normalized to GAPDH expression. Values are represented as relative to MSCs levels. Graphs represent mean ± SD of 3 independent experiments. Paired t-test was used for statistics. d) Representative western blot of hTERT protein; α-tubulin was used as a loading control. e) Relative telomerase activity (RTA) by relative-quantitative telomerase repeat amplification protocol assay (RQ-TRAP) in 1 × 10<sup>6</sup> MSC (black) and MSC-T (grey). Graphs represent the mean ± SD of 3 independent experiments. Paired t-test was used for statistics. f) Representative images of senescence associated β-galactosidase detection in MSC (left) and MSC-T (right) at passage 14. g) Proliferation assay. MSC (black) and MSC-T (red) growth curve; represented by doubling population at different timepoints. Each point represents the mean ± SD of 3 independent experiments. Paired t-test was used for statistics. \*p < 0.05, \*\*\*p < 0.001.

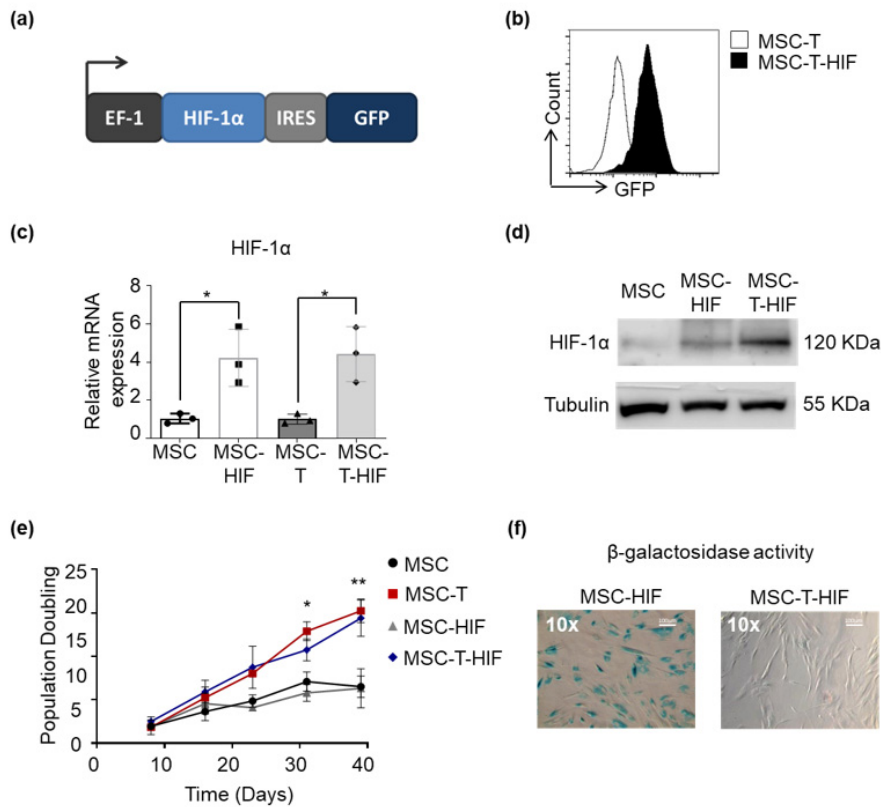

**Scheme 2. Overexpression of HIF-1α in MSCs-T does not affect cell lifespan.** a) Schematic representation of pWPI-HIF-1α-GFP lentiviral vector. b) Lentiviral transfection with pWPI-HIF-1α-GFP (MSCs-T-HIF) detected by flow cytometric analysis of GFP. c) HIF-1α gene expression levels detected by RT-qPCR in MSC-HIF (white bars) and MSC-T-HIF (stripped white bars). The expression levels of the target gene in each sample were normalized against GAPDH expression. MSCs were transduced with the empty pWPI-GFP vector. Graphs represent mean  $\pm$  SD of fold change of 3 independent experiments. Paired t-test was used for statistics. d) Representative western blot of HIF-1α protein in MSC transduced with pWPI-GFP, pWPI-HIF-1α-GFP or pWPI-HIF-1α-GFP followed by hTERT lentiviral vectors;  $\alpha$ -tubulin was used as a protein loading control. e) Proliferation assay. MSC (black), MSC-HIF (grey), MSC-T (red) and MSC-T-HIF (blue) growth curve; represented by doubling population time. Each point represents mean  $\pm$  SD of 3 independent experiments. Paired t-test was used for statistics. f) Representative image of senescence associated  $\beta$ -galactosidase detection in MSC-HIF (left) and MSC-T-HIF (right) at passage 14. \*  $p < 0.05$ .

(a)

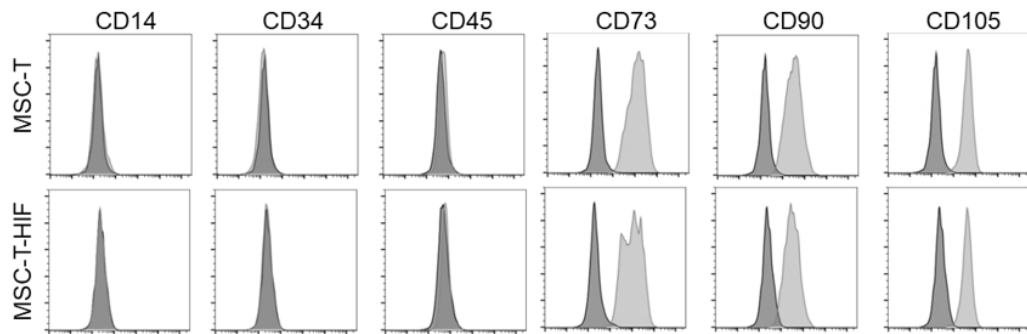

**Scheme 3.** Genetic modification does not affect characteristic MSC surface markers. Cell surface marker profile of different MSC lines.

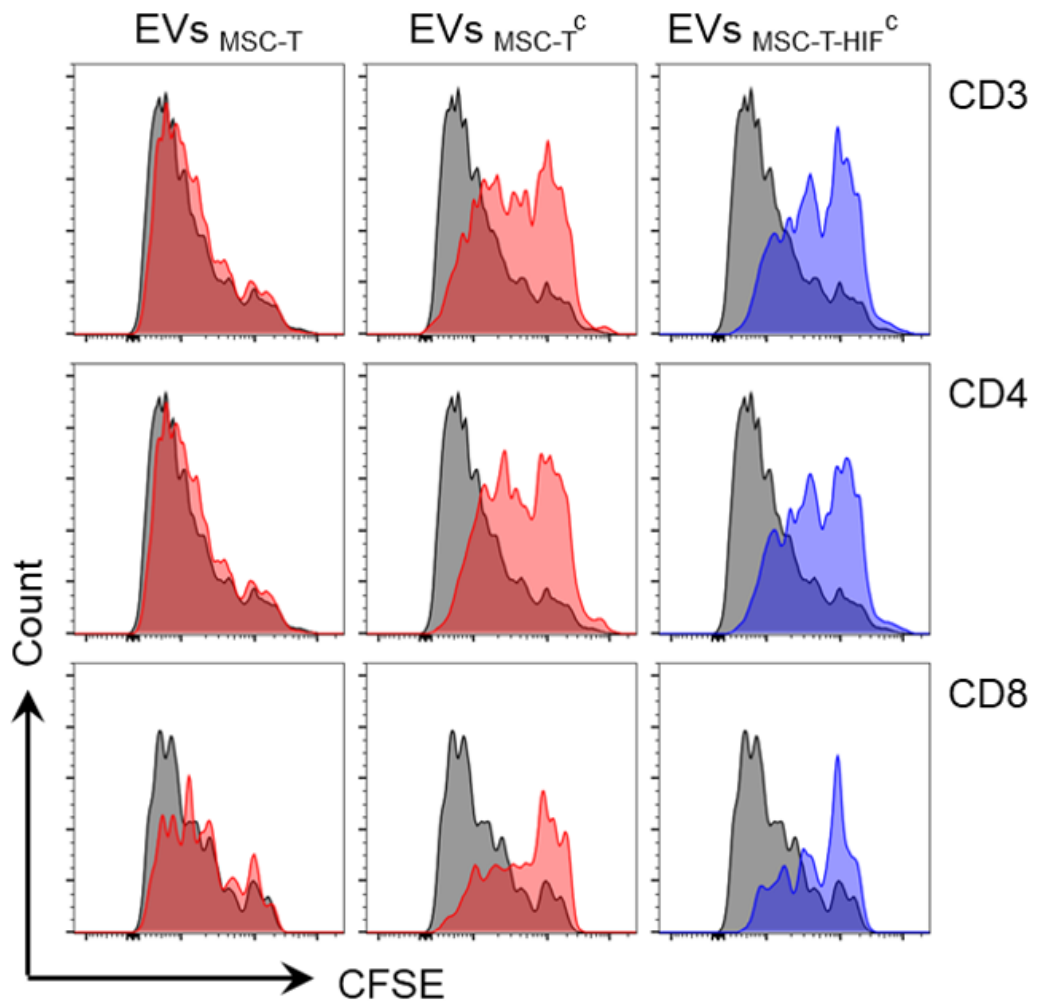

**Scheme 4. EVs from MSC-T-HIF<sup>c</sup> display enhanced immunosuppression properties.** Representative flow cytometry plots of CFSE dilution in CD3<sup>+</sup> cells activated with CD3/CD28 beads and treated with different EVs (colored) or without EVs (grey).

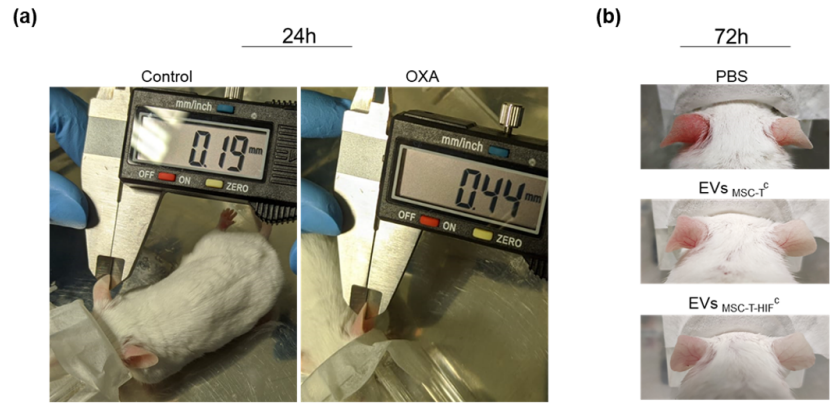

**Scheme 5. DTH measurements.** a) Images illustrating the procedure used to measure ear swelling using a digital caliper in a control or oxazolone treated mice. b) Representative images of ears in oxazolone treated mice, 72h after subcutaneous infusion of PBS, EVMSC-T and EVMSC-T-HIFc.
